# Supplementary material
Source: PubMed Central journal article supplement (PMC6641117)
Supplement: ao7b00517_si_001.pdf [file ao7b00517_si_001.pdf]

Supporting Information  
*for*  
**Copolymerization with Polyether Segments Improves the Mechanical  
Properties of Biodegradable Polyesters**

*Shuyi Wu, Yang Zhang, Jiarui Han, Zhining Xie, Jun Xu, Baohua Guo\**

Institute of Polymer Science and Engineering, Department of Chemical Engineering,  
Tsinghua University, Beijing 100084, China

\*Corresponding author: Prof. Baohua Guo. E-mail: bhguo@mail.tsinghua.edu.cn

## **List of Contents**

**Table S1.** Mechanical properties of PBS and PBS-PBSTMG blend films

**Table S2.** Tear strength of PBS and PBS-PBSTMG blend films

**Table S1.** Mechanical properties of PBS and PBS-PBSTMG blend films

| Sample             | Thickness (mm) | Tensile strength (MPa) | Elongation at break (%) |
|--------------------|----------------|------------------------|-------------------------|
| PBS (MD)           | 0.038          | 21.1                   | 106                     |
| PBS-10%PBSTMG (MD) | 0.044          | 32.4                   | 170                     |
| PBS-20%PBSTMG (MD) | 0.073          | 27.2                   | 258                     |
| PBS-30%PBSTMG (MD) | 0.055          | 27.3                   | 281                     |
| PBS (TD)           | 0.044          | 22.0                   | 18                      |
| PBS-10%PBSTMG (TD) | 0.035          | 15.6                   | 37                      |
| PBS-20%PBSTMG (TD) | 0.060          | 26.7                   | 106                     |
| PBS-30%PBSTMG (TD) | 0.045          | 23.4                   | 198                     |

**Table S2.** Tear strength of PBS and PBS-PBSTMG blend films

| Sample             | Thickness (mm) | Tear force (N) | Tear strength (kN/m) |
|--------------------|----------------|----------------|----------------------|
| PBS (TD)           | 0.045          | 2.37           | 52.7                 |
| PBS-10%PBSTMG (TD) | 0.045          | 3.96           | 88.0                 |
| PBS-20%PBSTMG (TD) | 0.056          | 3.81           | 68.0                 |
| PBS-30%PBSTMG (TD) | 0.053          | 4.91           | 92.6                 |
| PBS (MD)           | 0.066          | 2.86           | 43.3                 |
| PBS-10%PBSTMG (MD) | 0.075          | 4.00           | 53.3                 |
| PBS-20%PBSTMG (MD) | 0.050          | 3.24           | 64.7                 |
| PBS-30%PBSTMG (MD) | 0.045          | 0.98           | 21.8                 |
